# Supplementary material
Source: PubMed Central journal article supplement (PMC5930918)
Supplement: tpmd170781.SD1.pdf [file tpmd170781.SD1.pdf]

#### SUPPLEMENTAL TEXT 1

The patient received the following medications:

**Nifedipine**

10 mg given on Day 1 at 19:50, 20:10, 20:30, Day 2 04:00

**Magnesium sulfate**

1 ampule at 18:00 on Day 1

2 ampules at 19:45 on Day 1

1 ampule at 20:30 on Day 1

**Paracetamol**

500 mg at 20:00 on Day 1

500 mg at 04:00, 1 g at 14:30, and 1 g at 20:00 on Day 2

1 g at 0:00, 04:00, and 08:00 on Day 3

500 mg at 0:00, 6:00, 12:00, 18:00 on Day 4

500 mg at 0:00 and 6:00 on Day 5

**Ascorbic acid**

2 g at 20:00 on Day 2

2 g at 0:00, 8:00 and 12:00 on Day 3

1 g at 12:00 on Day 4

**Ampicillin**

2 g ampicillin given at 12:40 on Day 2

**Iron** was given: 1 tab 16:00 on Day 2

3 µg 04:00 on Day 3

**Iron and Folic acid**

(unknown dose) at 12:00 and 16:00 on Day 6

1 tab at 10:00 and 20:00 on Day 7

**Misoprostol**

25 µg given at 11:30 on Day 5

**Ketorolac**

60 mg at 08:00 on Day 10

**Saline 0.9%**

800 mL at 20:30 on Day 1

100 mL on Day 2 no time, 900 mL at 14:40 on Day 2, 1,000 mL on Day 2

1,000 mL at 12:00 on Day 3, 300 mL at 04:00 on Day 3

1,000 mL at 10:20 on Day 8 (same time Oxytocin), 1,000 mL at 18:00 on Day 8 also same time oxytocin

**Oxytocin**

10 UI at 10:20, 17:47, and 18:00 on Day 8

#### SUPPLEMENTAL TEXT 2

**Ultrasound taken on Day 2 of hospitalization showed an AFI of 25.6 cm and fetal heart rate of 166 beats per minute.** *Full translation of ultrasound:* "Report: Gestant uterus occupied by single, live fetus. Active fetal movements. Heart rhythmic, fetal heart rate 166 beats per minute. Position: cephalic, dorsal right. Anterior placenta, grade of maturation 2/4. Umbilical cord central with three vessels. Cord does not encircle spine. Amniotic liquid increased for gestational age, aspect clear. Amniotic fluid index (AFI) 25.6 cm. Anatomic structures observed during study appear normal. Cervix of normal aspect. Internal cervical orifice closed. Biparietal diameter 9.5 cm, abdominal circumference 33.81 cm, femur length 7.7 cm, and fetal weight 3,561 g. *Impression:* Pregnancy of 38 weeks 5 days, single live fetus, oligohydramnios, fetal tachycardia." Note, impression was erroneously written as "oligohydramnios" but is inconsistent with reported AFI of 25.6 cm, which indicates polyhydramnios. Original report is accompanied by question marks written in pen next to this error. Ultrasound images available on request.
